# Supplementary material for: Quality and Efficacy of Multidisciplinary Team (MDT) Quality Assessment Tools and Discussion Checklists: A Systematic Review
Source: Research Square preprint supplement (doi:10.21203/rs.3.rs-887717/v1), 2021-09-17
Supplement: Supplementary file 1 [file 3ec2bbf1698456a6e016f7a2.docx]

| **Table 2.** COSMIN15 study quality appraisals | | **COSMIN Risk of Bias Checklist** | | | | | | | | | |
| --- | --- | --- | --- | --- | --- | --- | --- | --- | --- | --- | --- |
| Content Validity | | Internal Structure | | | Remaining Measurement Properties | | | | |
| Study | Tool | 1. Tool Development | 2. Content Validity | 3. Structural Validity | 4. Internal Consistency | 5. Cross-Cultural Validity | 6. Reliability | 7. Measurement Error | 8. Criterion Validity | 9. Construct Validity | 10. Responsiveness |
| Lamb et al. 21 | MDT-MODe | Adequate | Very Good | N/A | N/A | N/A | Adequate | N/A | N/A | N/A | N/A |
| Lamb et al.33 | MDT-MODe | N/A | N/A | N/A | N/A | N/A | Adequate | N/A | N/A | N/A | N/A |
| Shah et al.26 | MDT-MODe | N/A | N/A | N/A | N/A | N/A | Adequate | N/A | N/A | N/A | N/A |
| Gandamihardja et al.27 | MDT-MODe | N/A | N/A | N/A | N/A | N/A | Very Good | N/A | N/A | N/A | N/A |
| Jalil et al.28 | MDT-MODe | N/A | N/A | N/A | N/A | N/A | Adequate | N/A | N/A | N/A | N/A |
| Soukup et al.10 | MDT-MODe | N/A | N/A | N/A | N/A | N/A | Adequate | N/A | N/A | N/A | N/A |
| Soukup et al.29 | MDT-MODe | N/A | N/A | N/A | N/A | N/A | Adequate | N/A | N/A | N/A | N/A |
| Soukup et al.31 | MDT-MODe | N/A | N/A | N/A | N/A | N/A | Adequate | N/A | N/A | N/A | N/A |
| Hahlweg et al al.30 | MDT-MODe | N/A | N/A | N/A | N/A | N/A | Very good | N/A | N/A | N/A | N/A |
| Lumenta et al.32 | MDT-MODe | N/A | Doubtful | N/A | N/A | N/A | Very good | N/A | N/A | N/A | N/A |
| Taylor et al.22 | MDT-OARS | Adequate | Doubtful | N/A | Doubtful | N/A | Adequate | N/A | N/A | N/A | N/A |
| Harris et al.24 | MDT-MOT | Very Good | Very Good | N/A | N/A | N/A | Very Good | N/A | Very Good | N/A | N/A |
| Taylor et al.19 | TEAM | Adequate | Very Good | N/A | Very Good | N/A | Adequate | N/A | N/A | N/A | N/A |
| Jalil et al. 20 | ATLAS | Very Good | Very Good | N/A | Very Good | N/A | Very Good | N/A | N/A | Very Good | N/A |
| Wihl et al.25 | ATLAS | N/A | N/A | N/A | N/A | N/A | Adequate | N/A | N/A | N/A | N/A |
| Lamb et al.23 | MDT-QuIC | Adequate | Very Good | N/A | N/A | N/A | N/A | N/A | N/A | N/A | N/A |
