# Supplementary material for: Quality and Efficacy of Multidisciplinary Team (MDT) Quality Assessment Tools and Discussion Checklists: A Systematic Review
Source: Research Square preprint supplement (doi:10.21203/rs.3.rs-887717/v1), 2021-09-17
Supplement: Supplementary file 2 [file 6aa4bcc476e71aed025b450f.docx]

| **Table 3.** Newcastle-Ottawa Scale16 Study Appraisals | | **Newcastle-Ottawa Quality Assessment Scale** | | | | | | | | |
| --- | --- | --- | --- | --- | --- | --- | --- | --- | --- | --- |
| Selection | | | | Comparability | Outcome | | | Total |
| Study | Tool | 1. | 2. | 3. | 4. | 1. | 1. | 2. | 3. | 6 |
| Lamb et al.34 | MDT-QuIC | ★ | ★ | ★ | - | - / - | ★ | ★ | ★ |
